# Supplementary material
Source: PubMed Central journal article supplement (PMC6642345)
Supplement: pnas.1900613116.sapp.pdf [file pnas.1900613116.sapp.pdf]

1 **Supporting Information**

2 **Direct Detection of Atmospheric Atomic Bromine Leading to Mercury**  
3 **and Ozone Depletion**

4

5 Siyuan Wang, Stephen M. McNamara, Christopher W. Moore, Daniel Obrist, Alexandra Steffen,  
6 Angela R. W. Raso, Paul B. Shepson, Ralf M. Staebler, Kerri A. Pratt \*

7

8 \* Corresponding Author: Kerri A. Pratt

9 Department of Chemistry, University of Michigan, Ann Arbor  
10 930 N. University Ave. Ann Arbor, Michigan 48109 USA  
11 prattka@umich.edu  
12 (734) 763-2871

13

14 **Atomic Bromine Calibration Experiments**

15 **Flow Tube Setup and Br<sub>2</sub> Calibration.** A quartz flow tube used for the calibration  
16 of atomic bromine in this work was adapted from previous chlorine monoxide (ClO)  
17 calibration experiments, as described by Custard et al (1). The flow tube is 122 cm long  
18 with an internal diameter of 6 cm. The inside of the flow tube, as well as glass connectors,  
19 were coated using Sylon CT (Sigma Aldrich) to occupy reactive surface sites to minimize  
20 wall losses. The flow tube is housed in a wooden box, surrounded by 6 light bulbs  
21 (PHILIPS 32W 3500K and SYLVANIA 32W 3500K) and a small fan to maintain room  
22 temperature. These light bulbs produce visible light in the range of ~400-700 nm. High  
23 purity N<sub>2</sub> boiling off from a liquid N<sub>2</sub> dewar was used as the carrier gas. A certified standard  
24 gas cylinder (Apel-Riemer Environmental) of 10.05 ppm (5% uncertainty) CH<sub>3</sub>CHO in  
25 ultrapure N<sub>2</sub> was used in these experiments. Fluorinated ethylene propylene (FEP) tubing  
26 was utilized unless otherwise noted.

27 For each experiment, Br<sub>2</sub> was calibrated using a permeation source ( $(80 \pm 3) \times 10^2$   
28 ng min<sup>-1</sup>, VICI), the rate of which was measured daily following the method of Liao et al  
29 (2). Br<sub>2</sub> mole ratios in the flow tube during experiments ranged from 3 to 22 ppb. Br<sub>2</sub> was

30 monitored as  $I^{79}\text{Br}^{79}\text{Br}^-$  at  $m/z$  285 and  $I^{79}\text{Br}^{81}\text{Br}^-$  at  $m/z$  287 with dwell times of 500 ms  
31 each. Background signals were obtained when only  $\text{N}_2$  was in the flow tube. Signals were  
32 background-subtracted and normalized to  $\text{I}(\text{H}_2^{18}\text{O})^-$  ( $m/z$  147), yielding a normalized  $\text{Br}_2$   
33 sensitivity ( $m/z$  287 /  $m/z$  147 /  $[\text{Br}_2]$ ,  $\text{Hz Hz}^{-1} \text{ppb}^{-1}$ ) of  $1.86 \pm 0.06 \text{ Hz Hz}^{-1} \text{ppb}^{-1}$ . The ratio  
34 between  $m/z$  285 and  $m/z$  287 was  $0.55 \pm 0.02$ , consistent with the theoretical stable  
35 isotopic ratio of  $^{79}\text{Br}_2$  vs  $^{79}\text{Br}^{81}\text{Br}$  (0.51:1). Direct  $\text{Br}_2$  injection (between 7 and 21 ppb) into  
36 the CIMS inlet without the flow tube yielded  $m/z$  285 and 287 signals statistically  
37 indistinguishable from that determined with the flow tube, confirming the wall loss of  $\text{Br}_2$   
38 in flow tube was negligible.

39 **Atomic Br Synthesis and Calibration.** Atomic bromine was produced by the  
40 photolysis of gaseous  $\text{Br}_2$ , which absorbs strongly in the 350-600 nm wavelength range (3).  
41 The fluctuation of light intensity, which peaked between 410 and 550 nm, was  $<20\%$  over  
42 30 min (usually lights were turned on for  $<10$  min).  $\text{CH}_3\text{CHO}$  was used to calculate the  
43 steady-state concentration of Br in the flow tube with lights on, because  $\text{CH}_3\text{CHO}$  does not  
44 absorb in the visible range (3) but reacts rapidly with atomic Br (4).  $\text{Br}_2$  and  $\text{CH}_3\text{CHO}$  were  
45 injected into the flow tube, carried by 17 lpm of  $\text{N}_2$ . The residence time of the flow tube  
46 was 12 s. The total flow rate was chosen for a short residence time, but without creating  
47 turbulence (Reynolds number  $\sim 370$ ), within the flow tube. The CIMS sampled 0.99 lpm  
48 from the centerline of the total flow, with the rest flowing to exhaust. Major species of  
49 interests monitored and corresponding dwell times during the flow tube experiments were:  
50  $\text{I}\text{H}_2^{18}\text{O}^-$  ( $m/z$  147; 100 ms),  $\text{I}^{79}\text{Br}^-$  and  $\text{I}^{81}\text{Br}^-$  ( $m/z$  206 and 208; 1000 ms each),  $\text{I}^{79}\text{Br}^{79}\text{Br}^-$ ,  
51  $\text{I}^{79}\text{Br}^{81}\text{Br}^-$ , and  $\text{I}^{81}\text{Br}^{81}\text{Br}^-$  ( $m/z$  285, 287, and 289; 500 ms each). Since  $m/z$  208 signal could  
52 be from  $\text{I}^{81}\text{Br}^-$  or  $\text{I}(^{35}\text{ClNO}_2)^-$ ,  $\text{I}(^{37}\text{ClNO}_2)^-$  at  $m/z$  210 was also monitored with a dwell time  
53 of 1000 ms;  $m/z$  210 ( $\text{ClNO}_2$ ) was not observed in any of the flow tube experiment,  
54 confirming a lack of  $\text{ClNO}_2$  contributing to  $m/z$  208. The total duty cycle was 8 s in the  
55 first stage of the experiments and then was decreased to 6.2 s for later experiments after  
56 confirming the absence of certain species in the flow tube. The isotopic ratios were used to  
57 confirm the presence of Br in the flow tube experiments (Figure S3).

58 The general procedure for an experiment was as follows.  $\text{CH}_3\text{CHO}$  (33-203 ppb)  
59 was first injected at least 5 min prior to  $\text{Br}_2$  injection to condition the  $\text{CH}_3\text{CHO}$  tubing and

60 the flow tube. Then Br<sub>2</sub> (1.9-7.0 ppb) was injected for 5-10 min while lights were off.  
 61 Lights were then turned on for 5-10 min to commence the production of Br via Br<sub>2</sub>  
 62 photolysis (and subsequent reaction with CH<sub>3</sub>CHO). After this period, the lights were  
 63 turned off, and both Br<sub>2</sub> and CH<sub>3</sub>CHO flows were disconnected. Different levels of atomic  
 64 bromine in the flow tube were obtained by varying Br<sub>2</sub> and CH<sub>3</sub>CHO. Figure S3(a) shows  
 65 an example of the time series of raw CIMS signals recorded during two representative  
 66 experiments. Figure S3(b) shows the ratio between *m/z* 206 and 208 during all 15  
 67 experiments, when both Br<sub>2</sub> and CH<sub>3</sub>CHO were injected with lights on. The ratio between  
 68 *m/z* 206 and 208 was  $1.113 \pm 0.002$ , within 8% of the stable isotopic ratio of <sup>79</sup>Br / <sup>81</sup>Br  
 69 (1.03), confirming the presence of Br as the dominant contributing species. Figure S4  
 70 shows CIMS mass scans under various experiment conditions. As shown, background  
 71 signals of *m/z* 206 (<sup>79</sup>Br<sup>-</sup>) and 208 (<sup>81</sup>Br<sup>-</sup>) were both negligible (less than 8 Hz) without  
 72 added Br<sub>2</sub> and with Br<sub>2</sub> in the dark, confirming the lack of Br atoms present prior to Br<sub>2</sub>  
 73 photolysis. Therefore, the *m/z* 206 and 208 signals when Br<sub>2</sub> was injected in the dark were  
 74 used as backgrounds for quantification of these signals during experiments. With the lights  
 75 on, *m/z* 206 and 208 were both elevated (50-400 Hz, depending on Br<sub>2</sub> and CH<sub>3</sub>CHO levels),  
 76 confirming the presence of Br atoms upon turning on the lights and initiating Br<sub>2</sub> photolysis.  
 77 The injection of CH<sub>3</sub>CHO partially suppresses both *m/z* 206 and 208 due to the Br +  
 78 CH<sub>3</sub>CHO reaction.

79 Assuming steady-state for atomic bromine in the flow tube (meaning that Br  
 80 produced from the photolysis of Br<sub>2</sub> is quenched by CH<sub>3</sub>CHO), the steady-state Br  
 81 concentration in the flow tube, [Br]<sub>ss</sub> (molec cm<sup>-3</sup>), is calculated as:

$$82 \quad [Br]_{ss} = \frac{2j_{Br_2}[Br_2]_{dark}}{k_{Br-CH_3CHO}[CH_3CHO]_{flowtube}} \quad \text{Eq.S1}$$

83 where  $j_{Br_2}$  (s<sup>-1</sup>) is the measured photolysis frequency of Br<sub>2</sub>, [Br<sub>2</sub>]<sub>dark</sub> (ppb) is the measured  
 84 Br<sub>2</sub> mole ratio in the flow tube when the lights were off,  $k_{Br-CH_3CHO}$  ( $= (2.7 \pm 0.4) \times 10^{-11}$   
 85  $\exp((-567 \pm 200)/T)$ , (4)) is the literature rate coefficient of the reaction of Br + CH<sub>3</sub>CHO  
 86 (with kinetic uncertainties propagated into the total uncertainty) (4), and [CH<sub>3</sub>CHO]<sub>flowtube</sub>  
 87 (molec cm<sup>-3</sup>) is the CH<sub>3</sub>CHO concentration in the flow tube (calculated based on the

88 measured flow rate and dilution ratio, at the beginning of the flow tube with lights off).  $j_{Br_2}$   
 89 was determined experimentally as follows:

$$90 \quad j_{Br_2} = -\frac{\ln\left(\frac{[Br_2]_{light}}{[Br_2]_{dark}}\right)}{\tau_{flowtube}} \quad \text{Eq.S2}$$

91 where  $[Br_2]_{light}$  (ppb) is the measured  $Br_2$  concentration in the flow tube when the lights  
 92 were on, and  $\tau_{flowtube}$  (s) is the flow tube residence time (12 s).

93 The calibration curve for Br is shown in Figure S3(c) as the background-subtracted  
 94 and normalized  $m/z$  206 ( $I^{79}Br^-$ ) signal versus the Br steady-state concentration. The  
 95 individual experimental Br sensitivities ranged from 2.3-3.0 Hz ppt<sup>-1</sup>, with the Br  
 96 sensitivity normalized to the reagent ion ( $I(H_2^{18}O)^-$ ) at  $m/z$  147 determined to be  $0.00104$   
 97  $\pm 0.00009$  Hz Hz<sup>-1</sup> ppt<sup>-1</sup>. Uncertainties from the  $Br_2$  permeation source (<8%),  $CH_3CHO$   
 98 standard (5%), kinetic uncertainty of  $CH_3CHO+Br$  reaction (~14%) (4), and all flow rate  
 99 measurements were propagated into the total measurement uncertainty. The Br sensitivity  
 100 factor relative to  $Br_2$  was determined to be  $0.56 \pm 0.05$  (with orthogonal distance regression  
 101 fitting error, based on 15 experiments and associated uncertainties).

102 **Investigating Potential Br Wall Loss, Br-Recombination, and Influence of  $NO_x$**   
 103 **and  $O_3$  during Flow Tube Experiments.** The wall loss rate of Br ( $k_{wall}$ , s<sup>-1</sup>) in the flow  
 104 tube can be estimated using a simple resistance model, based on Tang et al (5):

$$105 \quad k_{wall} = \frac{\gamma_{eff} \bar{c} S A_{flowtube}}{4} \quad \text{Eq.S3}$$

106 where  $\bar{c}$  (cm s<sup>-1</sup>) is the mean molecular speed ( $= 100 \sqrt{\frac{8RT}{\pi MW}}$ , with  $T$  as temperature,  $MW$   
 107 being the molecular weight of Br in kg mol<sup>-1</sup>, and  $R$  as the ideal gas constant).  $S A_{flowtube}$   
 108 (cm<sup>2</sup> cm<sup>-3</sup>) is the inner-surface-area-to-volume-ratio of the flow tube ( $\approx 4/d$ , where  $d$  is the  
 109 inner diameter of the flow tube, 6 cm).  $\gamma_{eff}$  (dimensionless) is the effective uptake  
 110 coefficient of Br on the flow tube wall, which is determined by gas-diffusion and reactive  
 111 uptake on the surface:

$$112 \quad \frac{1}{\gamma_{eff}} = \frac{1}{\gamma} + \frac{\bar{c}d}{4 \times 3.66 \times D_g} \quad \text{Eq.S4}$$

113 where  $\bar{c}$  is the mean Br molecular speed as above,  $\gamma$  (dimensionless) is the reactive uptake  
114 coefficient of Br on the flow tube wall,  $\frac{\bar{c}d}{4 \times 3.66 \times D_g}$  is the correction term for normalized gas-  
115 diffusion rate in a cylindrical tube, and  $D_g$  ( $\text{cm}^2 \text{s}^{-1}$ ) is the gas diffusivity. For rapid surface  
116 uptake, the overall process is limited by gas diffusion. At 298 K, assuming the maximum  
117 surface reactivity of Br on the flow tube wall ( $\gamma = 1$ ), a typical gas diffusivity (0.1-0.2  $\text{cm}^2$   
118  $\text{s}^{-1}$ ) (5) leads to a Br wall loss characteristic time of 12-25 s. Note that the actual wall loss  
119 characteristic time is expected to be longer, since the inside of the flow tube was treated  
120 with Sylon CT. The minimum  $\text{CH}_3\text{CHO}$  concentration used in all experiments was 33 ppb,  
121 leading to the maximum calculated Br chemical lifetime of only 0.3 s, much shorter than  
122 the calculated Br wall loss characteristic time (12-25 s) and the flow tube residence time  
123 (12 s). Therefore, Br loss to the walls of the flow tube is expected to be negligible under  
124 the conditions of the Br calibration experiments.

125 In this study, the steady-state concentration of Br in the flow tube during  
126 experiments was <50 ppt. At 298 K, the Br re-combination rate to produce  $\text{Br}_2$  ( $\text{Br} + \text{Br} +$   
127  $\text{M} \rightarrow \text{Br}_2 + \text{M}$ ; for  $\text{M} = \text{N}_2$ ) is calculated to be  $(8 \pm 3) \times 10^{-33} \times [\text{M}] \text{ cm}^6 \text{ molec}^{-2} \text{ s}^{-1}$  (6).  
128 Therefore, the characteristic time for Br re-combination for 50 ppt Br is calculated to be  
129  $4 \times 10^3$  s, much longer than that of  $\text{Br} + \text{CH}_3\text{CHO}$  reaction (< 0.3 s). Therefore, re-  
130 combination of Br in this work is not expected to be significant, and  $\text{Br}_2$  reformed would  
131 subsequently photolyze.

132 Lastly, the possible influence of  $\text{NO}_x$  and  $\text{O}_3$  in the calibration experiments can be  
133 ignored, as Br in the flow tube was primarily scavenged by  $\text{CH}_3\text{CHO}$ . NO in the flow tube  
134 was measured using a chemiluminescence detector (7) to be below the instrument LOD  
135 (70 ppt) during experiments.  $\text{O}_3$  was measured to be below the instrument LOD (1 ppb)  
136 using an ozone monitor (Model 405, 2B Technologies). Using the kinetics summarized by  
137 Burkholder et al (3), the characteristic times of  $\text{Br} + \text{NO}_2$  and  $\text{Br} + \text{O}_3$  reactions were  
138 calculated as 118 s and 35 s, respectively, assuming the maximum possible levels (LODs:  
139 70 ppt  $\text{NO}_2$  and 1 ppb  $\text{O}_3$ ) present in the flow tube. These are much longer than the  
140 characteristic time of the  $\text{Br} + \text{CH}_3\text{CHO}$  reaction (<0.3 s), such that Br was primarily lost  
141 through reaction with  $\text{CH}_3\text{CHO}$ , and it can be assumed that  $\text{NO}_2$  and  $\text{O}_3$  reactions with Br  
142 were negligible.

143 **Br Production by CHBr<sub>3</sub> Photolysis.** Additional experiments were performed to  
144 identify an alternate source of Br atoms via the photolysis of bromoform (CHBr<sub>3</sub>). The  
145 photolysis of CHBr<sub>3</sub> was examined using the same flow tube as described in Section S2.  
146 CHBr<sub>3</sub> absorbs in the UV range (<300 nm), producing Br atoms (3). UV light bulbs (in the  
147 range of 300-420 nm, Q-Lab UVA340)(8) were used in this experiment. Figure S4(d)  
148 shows mass scans of flow tube background (N<sub>2</sub> only), ~17 ppm CHBr<sub>3</sub> under dark  
149 conditions, and CHBr<sub>3</sub> with UV lights on. Note that the dwell times of *m/z* 206 and 208 in  
150 the CHBr<sub>3</sub> mass scans were 200 ms. As shown, the signals for *m/z* 206 (<sup>79</sup>Br<sup>-</sup>) and 208  
151 (<sup>81</sup>Br<sup>-</sup>) were negligible (<19 Hz) with only N<sub>2</sub> and for CHBr<sub>3</sub> added in the dark (<49 Hz).  
152 The presence of CHBr<sub>3</sub> was confirmed by the peaks detected at *m/z* 377 (ICH<sup>79</sup>Br<sub>3</sub><sup>-</sup>), 379  
153 (ICH<sup>79</sup>Br<sup>81</sup>Br<sub>2</sub><sup>-</sup>), 381 (ICH<sup>79</sup>Br<sub>2</sub><sup>81</sup>Br<sup>-</sup>), and 383 (ICH<sup>81</sup>Br<sub>3</sub><sup>-</sup>), with relative peak intensities  
154 of 0.40:1.00:1.11:0.31, respectively, close to the theoretical isotope ratio of  
155 0.34:1.00:0.98:0.32. When CHBr<sub>3</sub> added with lights on, *m/z* 206 (<sup>79</sup>Br<sup>-</sup>) and 208 (<sup>81</sup>Br<sup>-</sup>)  
156 were both elevated (up to 146 Hz), with the peak ratio (*m/z* 206 / *m/z* 208) being 1.0,  
157 consistent with the stable isotope ratio of <sup>79</sup>Br / <sup>81</sup>Br (1.03), confirming the production and  
158 detection of ~53 ppt Br from the photolysis of ~17 ppm CHBr<sub>3</sub>.

159 **Investigating Potential Fragmentation of Br-containing Species in CIMS.** In  
160 this section, we show that the *m/z* 206 and 208 signals (IBr<sup>-</sup>) detected in the field were not  
161 the result of fragmentation of Br<sub>2</sub>, HOBr, or CHBr<sub>3</sub> from the chemical ionization process.  
162 Upon injection of up to 3.9 ppb of Br<sub>2</sub>, ~two orders of magnitude higher than typically  
163 observed in the Arctic boundary layer (9–11), into the flow tube under dark conditions (no  
164 photolysis), signals at *m/z* 206 and 208 remained low (< 8 Hz). This confirms that Br<sub>2</sub> did  
165 not interfere with the measurement of Br at *m/z* 206 and 208 (Section S2.2, Figure S3 (a)).  
166 A similar argument can be made for HOBr as well. There is no evidence for a significant  
167 contribution to IBr<sup>-</sup> from HOBr, due to the lack of correlation between the ambient Br (IBr<sup>-</sup>)  
168 and HOBr (IHOBr<sup>-</sup>) signals (Figure 1 and Figure 2). Similarly, CHBr<sub>3</sub> measured in the  
169 dark does not result in significant *m/z* 206 and 208 signals (Section S2.4 and Figure S4(d)).  
170 The ratio between *m/z* 206 and 208 in this study (background-subtracted) was always  
171 consistent with the stable isotope ratio of Br (Section S2.2), providing further evidence that  
172 the *m/z* 206 and 208 signals in this work can be uniquely attributed to atomic Br, rather  
173 than an artifact of the chemical ionization of other bromine species.

174 Unlike Br<sub>2</sub>, HOBr, and CHBr<sub>3</sub>, nitryl bromide (BrNO<sub>2</sub>) can fragment and produce  
175 IBr<sup>-</sup> signal at *m/z* 206 and 208 within the CIMS. To characterize this, BrNO<sub>2</sub> was  
176 synthesized by passing ~10 ppb Br<sub>2</sub> in N<sub>2</sub> over a solution of 0.1 M NaNO<sub>2</sub> (12), BrNO<sub>2</sub>  
177 was observed primarily as IBrNO<sub>2</sub><sup>-</sup> at *m/z* 252 and 254, with a *m/z* 252 / *m/z* 254 ratio of  
178 1.06, consistent with the stable isotopic ratio of <sup>79</sup>Br and <sup>81</sup>Br (1.03). Signal at *m/z* 252  
179 (I<sup>79</sup>BrNO<sub>2</sub><sup>-</sup>) was on average 6.5 ± 0.8 times greater than signal at *m/z* 206 (I<sup>79</sup>Br<sup>-</sup>). Similarly,  
180 *m/z* 254 (I<sup>81</sup>BrNO<sub>2</sub><sup>-</sup>) was 6.8 ± 0.9 times greater than signal at *m/z* 208 (I<sup>81</sup>Br<sup>-</sup>). We can  
181 apply these signal ratios to the 2012 BROMEX ambient measurements to estimate the  
182 maximum fraction of IBr<sup>-</sup> signal that could be due to fragmentation of BrNO<sub>2</sub>. For the  
183 BROMEX data, positive identification of BrNO<sub>2</sub> could not be achieved as the ratio of the  
184 signals at *m/z* 252 and *m/z* 254 were not in agreement with the corresponding natural  
185 isotopic abundance of <sup>79</sup>Br and <sup>81</sup>Br (1.03). Also, the *m/z* 254 signal did not rise above the  
186 background. At *m/z* 252, the signal was only above LOD and correlated with *m/z* 206  
187 during two short periods (20:30 – 22:00 AKST 19 March 2012 and 7:30 – 9:30 AKST 20  
188 March 2012). For context, the maximum normalized, background subtracted *m/z* 252 signal  
189 was 0.019 ± 0.005 Hz/Hz (8:39 – 9:14 AKDT 20 March 2012). Apply the ratio of 6.5 for  
190 I<sup>79</sup>BrNO<sub>2</sub><sup>-</sup>/I<sup>79</sup>Br<sup>-</sup>, we estimate that a maximum of 0.003 Hz/Hz of I<sup>79</sup>Br<sup>-</sup> could potentially  
191 be attributed to IBrNO<sub>2</sub><sup>-</sup> fragmentation, which corresponds to 20% of the total observed  
192 signal of 0.015 Hz/Hz at *m/z* 206. This is within the average estimated uncertainty in Br  
193 during BROMEX of 23% + 0.2 ppt. However, to be cautious, for these two identified  
194 periods of potential interference, the IBr<sup>-</sup> signal that was possibly due to BrNO<sub>2</sub> is  
195 accounted for in the errors bars of the Br atom mole ratios during this period, as shown in  
196 Figure 2.

197

### 198 **Modeled Br / BrO ratios: Importance of Br<sub>2</sub>**

199 Here, we examine uncertainties in the modeled Br/BrO ratio and show that Br<sub>2</sub> has  
200 a significant impact on Br/BrO ratios during ODEs. For comparison to measurements,  
201 Br/BrO ratios were modeled by constraining to measured Br<sub>2</sub>, BrO, ClO, temperature,  
202 TUV-calculated *j*-values (10). NO<sub>x</sub> was varied from 10 to 193 ppt based on previous  
203 measurements during March 2009 near Utqiagvik, AK (13). The modeled Br/BrO ratio is



204 very sensitive to  $\text{NO}_x$  and  $\text{O}_3$ , as shown in Figure S6. The modeled Br/BrO ratios track the  
205 measured values, but are overestimated by up to a factor of 3 when  $\text{O}_3$  was below  $\sim 2$  ppb,  
206 and underestimated by up to a factor of 5 when  $\text{O}_3$  was above  $\sim 2$  ppb. When  $\text{O}_3$  was below  
207  $\sim 2$  ppb, the model uncertainty in the Br/BrO ratio was dominated by the  $\text{O}_3$  measurement  
208 uncertainty; in contrast, when  $\text{O}_3$  was above  $\sim 2$  ppb, the model uncertainty in the Br/BrO  
209 ratio was dominated by the estimated range in  $\text{NO}_x$ . With respect to both model  
210 uncertainties and CIMS measurement uncertainties, the modeled Br/BrO ratio was in  
211 agreement with the modeled Br/BrO ratio calculated based on CIMS measurements. This  
212 analysis highlights the importance of  $\text{NO}_x$  measurements, as well as high accuracy  $\text{O}_3$   
213 measurements at sub-ppb levels.

214 Table S1 summarizes the calculated Br / BrO ratio for two previous field campaigns  
215 (Alert 2000: 29 April – 6 May 2000 in Alert, Canada; and OASIS 2009: 26-29 March 2009  
216 in Utqiagvik, AK) in which  $\text{O}_3$  was both completely depleted ( $< 2$  ppb). In the case of  
217 OASIS 2009, mean  $\text{Br}_2$  observed during the entire ODE was 2.5 ppt (11); We calculate the  
218 Br / BrO ratio to be underestimated by up to a factor of 4.3 if  $\text{Br}_2$  is not considered  
219 (calculated Br / BrO: 19.3 and 4.4 with and without observed  $\text{Br}_2$ , respectively, Table S1).  
220 During OASIS 2009,  $\text{BrCl}$  was also measured (14); Figure S7 shows that, when  $\text{O}_3$  was  
221 above  $\sim 20$  ppb, the  $\text{BrCl}$  contribution to Br production is expected to be as important as  
222 that of  $\text{Br}_2$ . Therefore, under these conditions, the bias in modeled Br/BrO is expected to  
223 be even larger than when considering only  $\text{Br}_2$ . Considering available data from Alert 2000  
224 (Table S1), the Br/BrO ratio is estimated to be 1.0 at 1.7 ppb  $\text{O}_3$ . However,  $\text{Br}_2$  was not  
225 measured during Alert 2000. If we consider the presence of only 1 ppt  $\text{Br}_2$ , the calculated  
226 Br/BrO ratio would be enhanced by 50%, again showing the importance of knowledge of  
227 molecular halogen levels for the calculation of Br/BrO ratios and Br atom mole ratios.

228

### 229 **Br-induced $\text{O}_3$ loss: a case study**

230 During BROMEX, a complete  $\text{O}_3$  depletion event was observed on 15 March 2012  
231 (Figure 1), and the observed  $\text{O}_3$  loss rate was up to  $3 \text{ ppb h}^{-1}$ . The Br measurements enabled  
232 the direct calculation of Br-induced ozone loss. Br-induced  $\text{O}_3$  loss can be calculated using  
233 Equation S5 and measured Br,  $\text{O}_3$ , and BrO (Section S4) (15):



234  $O_3 \text{ Loss by Br} = k_{Br+O_3}[Br][O_3] - j_{BrO}[BrO] - k_{BrO+NO}[BrO][NO]$  Eq.S5

235 Here,  $O_3$  is lost via reaction with Br (R2) and regenerated via BrO photolysis (R3) and  
 236 reaction with NO (R4) (16). Figure S8 shows the observed  $O_3$  loss rate, as well as the direct  
 237 calculation using Br measurements (Eq.1). Due to the lack of  $NO_x$  measurements, an  
 238 observationally constrained box-model was used to calculate  $NO_x$  (10). As previously  
 239 described by Wang and Pratt, the model was constrained to measured  $Br_2$  and  $NO_x$  was  
 240 tuned until modeled BrO and HOBr were both in reasonable agreement with CIMS  
 241 observations (mostly within ~35%, consistent with the measurement uncertainties of BrO  
 242 and HOBr). The modeled  $NO_x$  mole ratio (10) in the case of 15 March 2012 was  $69 \pm 28$   
 243 ppt (average  $\pm$  standard deviation) (10), in reasonable agreement with spring 2009  $NO_x$   
 244 measurements at Utqiagvik, AK (up to 193 ppt) (11, 13). The calculated bromine-induced  
 245  $O_3$  loss rate (Figure S8) is in good agreement with observations, implying the  $O_3$  loss on  
 246 15 March was dominated by local reactive bromine chemistry. We have therefore  
 247 demonstrated that with the Br measurements, the  $O_3$  chemical loss rate can be directly  
 248 calculated using Eq.1, which is the definition of  $O_3$  chemical loss.

249

250 **Apparent rate coefficient of bromine-induced  $Hg^0$  oxidation**

251 Br-induced  $Hg^0$  oxidation occurs via reaction to produce HgBr (R.S1) (17). HgBr  
 252 (i.e.  $Hg^I$ ) is unstable and can undergo thermal decomposition to produce  $Hg^0$  (R.S2), or  
 253 react with Br or  $NO_2$  to reproduce  $Hg^0$  (R.S3 and R.S4) (17). HgBr can also be further  
 254 oxidized into  $Hg^{II}$ , such as  $HgBr_2$  or  $HgBrNO_2$ , respectively (via R.S5 or R.S6).

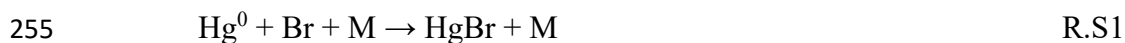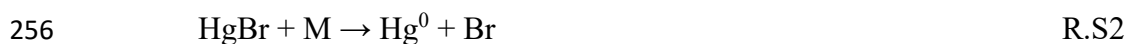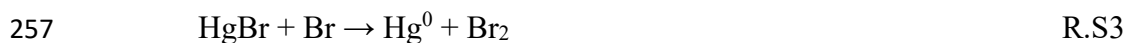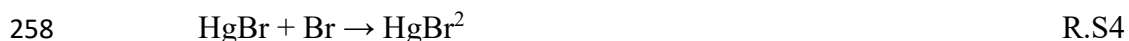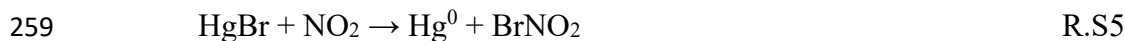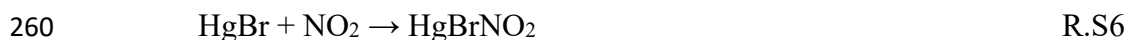

261 The dependence of Hg oxidation on Br and NO<sub>2</sub> is shown in Figures S9. Our calculation  
262 suggests more rapid Hg<sup>0</sup> loss at colder temperatures and higher Br mole ratios. With less  
263 than ~10 ppt NO<sub>2</sub>, the apparent Hg<sup>0</sup> loss rate scales with NO<sub>2</sub> mixing ratios, but above ~10  
264 ppt NO<sub>2</sub>, the Hg<sup>0</sup> loss rate becomes less sensitive to the NO<sub>2</sub> levels.

265

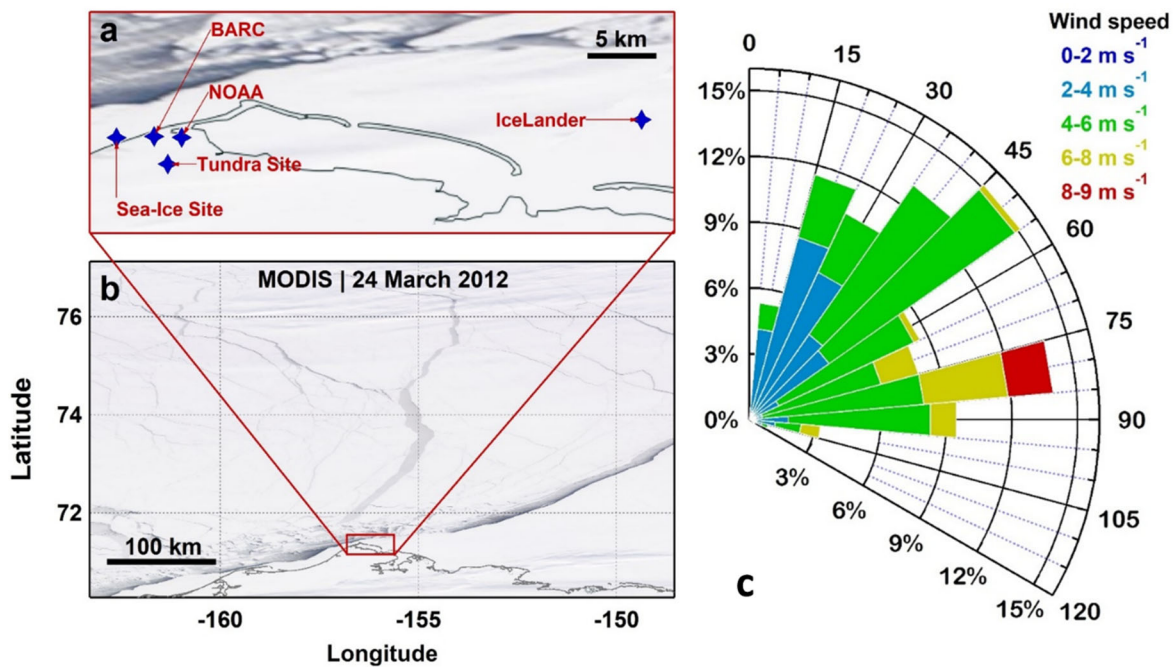

267

268 **Figure S1. Measurement site locations during the BROMEX study (18) and**  
 269 **corresponding sea ice and snow conditions on 24 March 2012 (a and b), as well as the**  
 270 **wind direction and speed from 14-28 March 2012 (c). The satellite image (30 m and 125**  
 271 **m resolution in panels (a) and (b), respectively; NASA Moderate Resolution Imaging**  
 272 **Spectroradiometer (MODIS): <https://modis.gsfc.nasa.gov/>) represents sea-ice condition on**  
 273 **24 March 2012, which is discussed in detail in Moore et al (19). Tundra site: 71.2751N,**  
 274 **156.6403W; NOAA Barrow Observatory: 71.3230N, 156.6114W; Barrow Arctic Research**  
 275 **Center (BARC): 71.3250N, 156.6680W; Sea-ice site (frozen Chukchi Sea): 71.3227N,**  
 276 **156.7453W; and IceLander (frozen Beaufort Sea): 71.3550, 155.6680W. The wind**  
 277 **direction range observed indicates influence from the Beaufort Sea, with no influence from**  
 278 **the town of Utqiagvik to the southeast.**

279

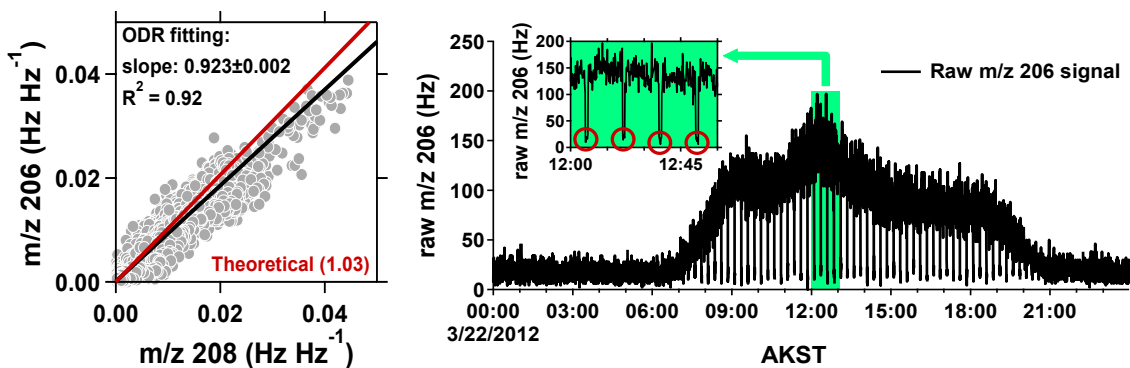

280

281 **Figure S2. (a) Background-subtracted 1-min averaged  $m/z$  206 ( $I^{79}Br^-$ ) vs  $m/z$  208**  
 282 **( $I^{81}Br^-$ ), each normalized by  $m/z$  147  $I(H_2^{18}O^-)$ , measured using CIMS during 14-28**  
 283 **March 2012 near Utqiagvik, AK (tundra site). (b) The raw ambient  $m/z$  206 signal is**  
 284 **shown for 22 March 2012, demonstrating that atomic bromine ( $IBr^-$ ) was efficiently**  
 285 **removed by the glass wool scrubber during background periods (red circles). The**  
 286 **theoretical slope based on bromine isotopes (1.03) is within 10% of that measured (0.92).**

287

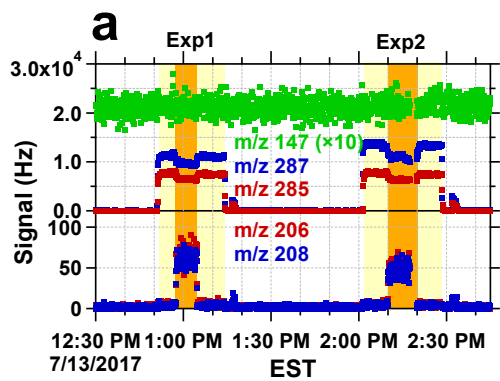

288

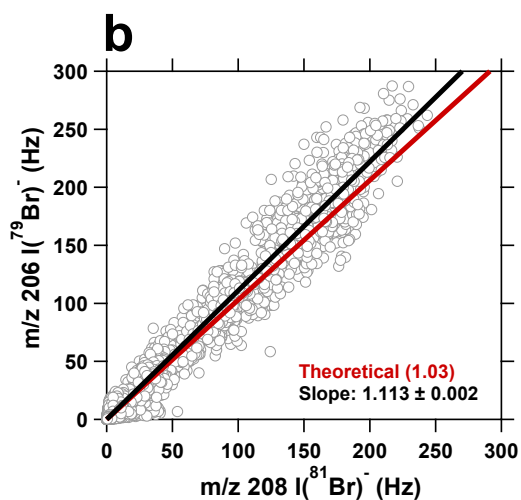

289

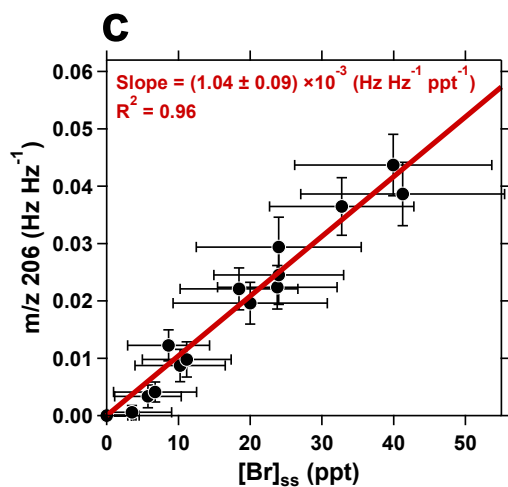

290

291 **Figure S3. (a)**  $I(\text{H}_2^{18}\text{O})^-$  ( $m/z$  147),  $I^{79}\text{Br}^{79}\text{Br}^-$  ( $m/z$  285), and  $I^{79}\text{Br}^{81}\text{Br}^-$  ( $m/z$  287) signals  
 292 measured during two laboratory flow tube experiments: (Exp1) 3.7 ppb  $\text{Br}_2$  and 35  
 293 ppb  $\text{CH}_3\text{CHO}$ , and (Exp2) 3.9 ppb  $\text{Br}_2$  and 48 ppb  $\text{CH}_3\text{CHO}$ , respectively. Light  
 294 yellow shading indicates  $\text{Br}_2$  injection in the dark, while orange shading shows periods

295 when the lights were on.  $m/z$  285 ( $I^{79}\text{Br}^{79}\text{Br}^-$ ) and  $m/z$  287 ( $I^{79}\text{Br}^{81}\text{Br}^-$ ) were both elevated  
296 with  $\text{Br}_2$  injection under dark conditions. Upon irradiation, both  $m/z$  285 and  $m/z$  287  
297 decreased while  $m/z$  206 ( $I^{79}\text{Br}^-$ ) and  $m/z$  208 ( $I^{81}\text{Br}^-$ ) increased, indicating atomic Br  
298 formation. **(b) Background-subtracted signals of  $m/z$  206 ( $I^{79}\text{Br}^-$ ) vs.  $m/z$  208 ( $I^{81}\text{Br}^-$ )**  
299 **during all 15 Br atom calibration experiments.** Black and red lines denote ODR fitting  
300 of measured signals and the theoretical stable isotopic ratio of  $^{79}\text{Br} / ^{81}\text{Br}$  (1.03),  
301 respectively. The measured slope (1.1) is within 7% of the theoretical value (1.03). **(c)**  
302 **Calibration curve for atomic Br ( $I^{79}\text{Br}^-$ ,  $m/z$  206), showing the normalized and**  
303 **background-subtracted signal versus the calculated steady-state Br atom mole ratio**  
304 **(ppt).** Each solid black circle is an average for a single calibration experiment (with  $\text{Br}_2$   
305 and / or  $\text{CH}_3\text{CHO}$  varied). Error bars represent the total measurement uncertainties, as  
306 described in the Methods.

307

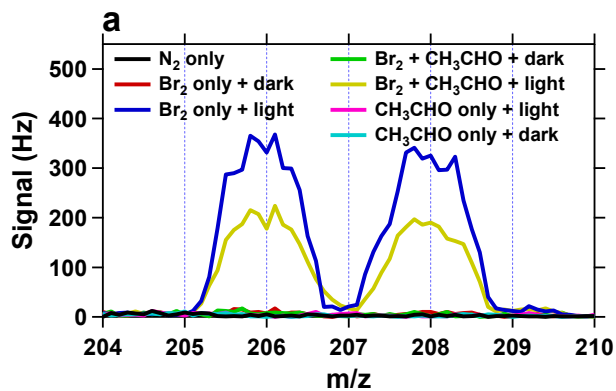

308

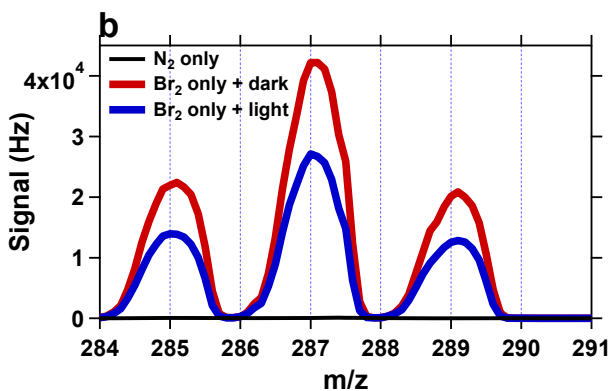

309

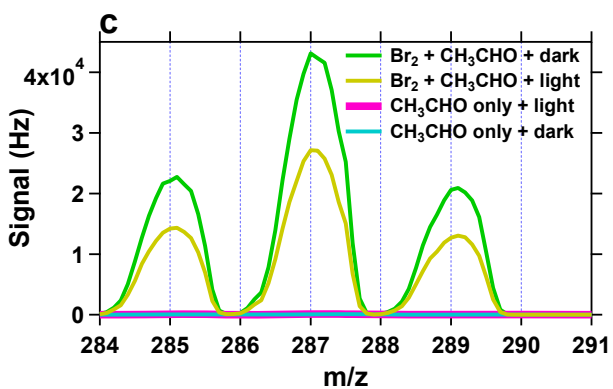

310

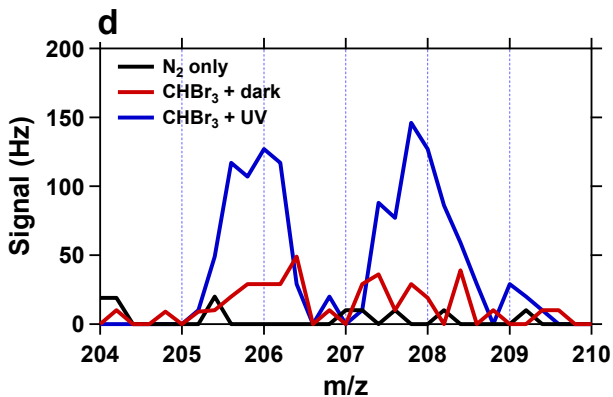

311



312 **Figure S4. Mass scans of (a)  $m/z$  204-210 for Br and (b, c)  $m/z$  284-291 for Br<sub>2</sub> during**  
313 **the laboratory experiments when Br<sub>2</sub> and / or CH<sub>3</sub>CHO were injected into the flow**  
314 **tube.** The mass dwell times in (a), (b), and (c) were 1000 ms, and the step size was 0.1  
315 amu. As shown in panel (a), with N<sub>2</sub> only,  $m/z$  206 ( $I^{79}\text{Br}^-$ ) and 208 ( $I^{81}\text{Br}^-$ ) backgrounds  
316 (black) were below LODs until Br<sub>2</sub> was injected in the dark (red and green, without and  
317 with CH<sub>3</sub>CHO). With Br<sub>2</sub> only and lights on,  $m/z$  206 and 208 were both elevated (blue);  
318 slightly lower  $m/z$  206 and 208 were observed when CH<sub>3</sub>CHO was also injected (yellow).  
319 CH<sub>3</sub>CHO alone (dark: cyan; light: pink; panels (b) and (c)) did not affect  $m/z$  206 and 208  
320 signals. As shown in panel (b), with N<sub>2</sub> only,  $m/z$  285 ( $I^{79}\text{Br}^{79}\text{Br}^-$ ), 287 ( $I^{79}\text{Br}^{81}\text{Br}^-$ ), and  
321 289 ( $I^{81}\text{Br}^{81}\text{Br}^-$ ) backgrounds were all below LODs. When Br<sub>2</sub> was injected under dark  
322 conditions,  $m/z$  285, 287, and 289 were all elevated (red in panel(b)); adding CH<sub>3</sub>CHO  
323 (green, panel (c)) did not affect  $m/z$  285, 287, and 289. When Br<sub>2</sub> was injected with the  
324 lights on,  $m/z$  285, 287, and 289 were lower than with lights off (blue, panel (b)) due to  
325 photolysis; adding CH<sub>3</sub>CHO (yellow, panel (c)) did not affect  $m/z$  285, 287, and 289, as  
326 expected. **(d) Mass scans in the  $m/z$  204-210 range during the laboratory tests with**  
327 **CHBr<sub>3</sub> injected into the flow tube.** The mass dwell time in (d) was 200 ms, and the step  
328 size was 0.2 amu. As shown in panel (d), with N<sub>2</sub> only,  $m/z$  206 and 208 were both low  
329 (<19 Hz in this case). Elevated  $m/z$  206 and 208 signals (<49 Hz) were observed with ~17  
330 ppm CHBr<sub>3</sub> injected under dark conditions; upon irradiation,  $m/z$  206 and 208 were  
331 elevated, consistent with the production of Br due to CHBr<sub>3</sub> photolysis.

332

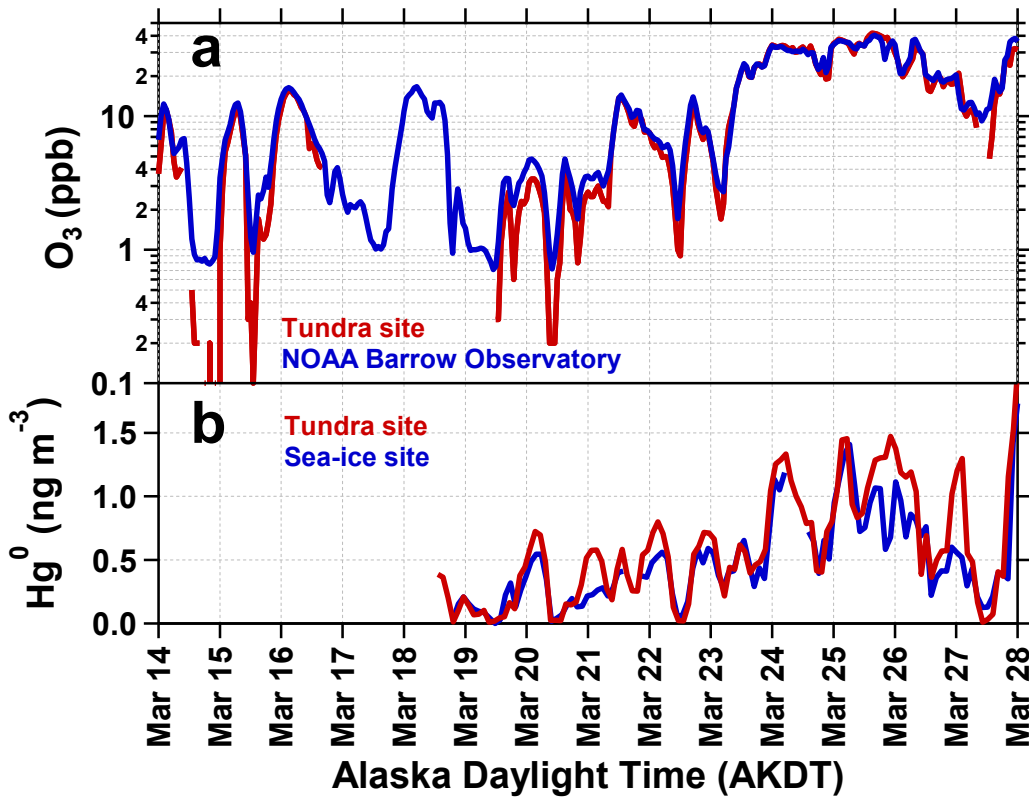

333

334 **Figure S5. (a) O<sub>3</sub> measured at both the tundra site (2B Technologies model 205) and**  
 335 **NOAA Barrow Observatory (Thermo Fisher model 49i); (b) Hg<sup>0</sup> measured at both**  
 336 **the tundra site and sea-ice site. Differences in the O<sub>3</sub> measurements are due to**  
 337 **differences in instrument limits of detection, as discussed in the Methods.**

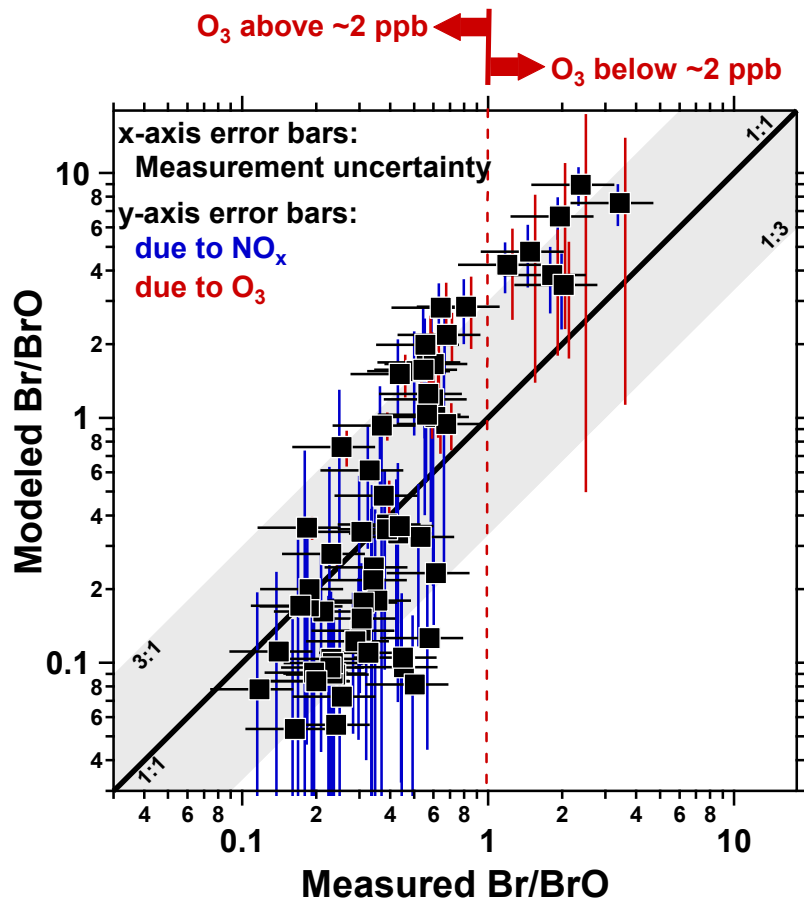

338

339 **Figure S6. Modeled Br/BrO ratio (with Br<sub>2</sub> constrained) vs measured.** As described in  
 340 Section S2, the model was constrained to measured Br<sub>2</sub>, BrO, ClO, temperature, TUV-  
 341 calculated j-values. For the modeled Br/BrO ratios, the red error bars represent model  
 342 uncertainty due to O<sub>3</sub> measurement uncertainty (1 ppb), and blue error bars represent model  
 343 uncertainty due to the NO<sub>x</sub> range (10-193 ppt).<sup>(13)</sup> Measured Br/BrO error bars are  
 344 propagated from CIMS measurement uncertainties of Br and BrO. Dark grey shading  
 345 indicates the kinetic uncertainties of bromine reactions at 250 K (total kinetic uncertainty:  
 346 82%; uncertainties of j-values are assumed to be 30%).<sup>(3)</sup>

347

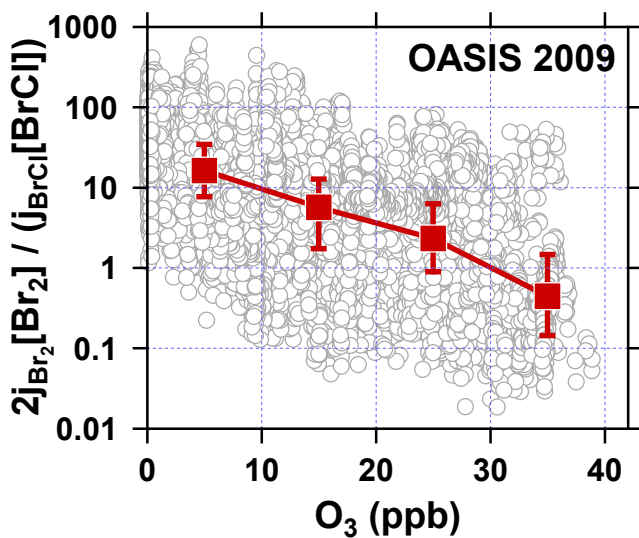

348

349 **Figure S7. Calculated ratio between the Br production rate from the photolysis of**  
 350 **measured Br<sub>2</sub> and the Br production rate from the photolysis of measured BrCl, as a**  
 351 **function of measured O<sub>3</sub> during the OASIS field campaign in March 2009 near**  
 352 **Utqiagvik, AK.** Grey circles are raw data, while red boxes are binned medians with 25%  
 353 and 75% percentiles shown. Br<sub>2</sub> and BrCl were from CIMS measurements (9, 14), O<sub>3</sub> was  
 354 measured using the chemiluminescence technique (13), and j-values were calculated using  
 355 the Tropospheric Ultraviolet and Visible (TUV) radiation model based on in situ  
 356 measurements of down-welling actinic flux conducted throughout the duration of the 2009  
 357 OASIS campaign (11) and a surface albedo of 0.9 (20).

358

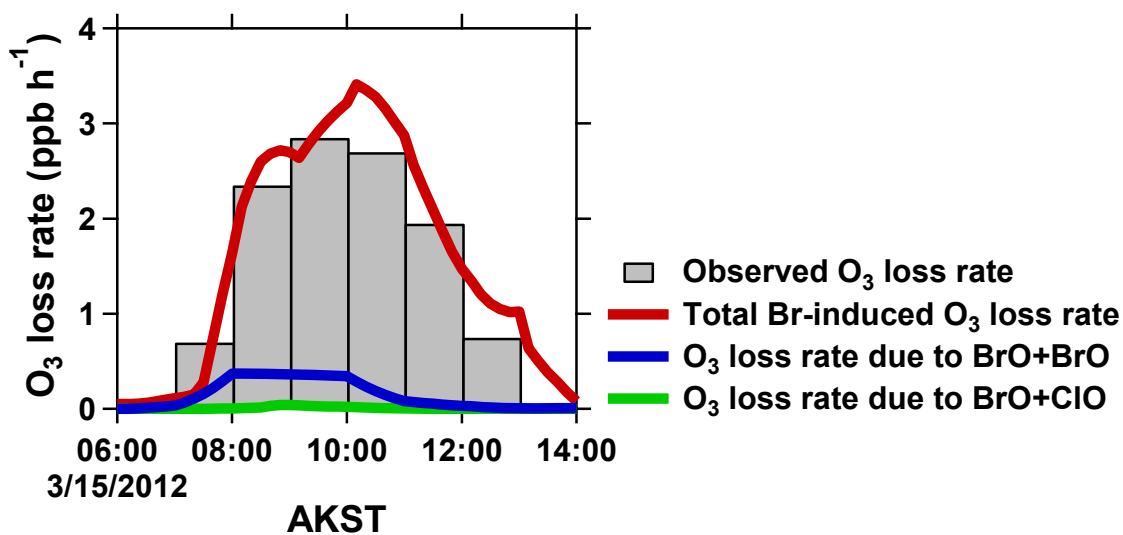

359

360 **Figure S8. Observed (gray) and calculated (red, blue, and green) O<sub>3</sub> loss rates for 15**  
 361 **March 2012 near Utqiagvik, AK (tundra site).** The red line is the total bromine-induced  
 362 O<sub>3</sub> loss rate, as calculated using Equation S5. The blue and green lines are the O<sub>3</sub> loss rates  
 363 due to BrO+BrO and BrO+ClO, respectively, using Equation 2 in Thompson et al (15).

364

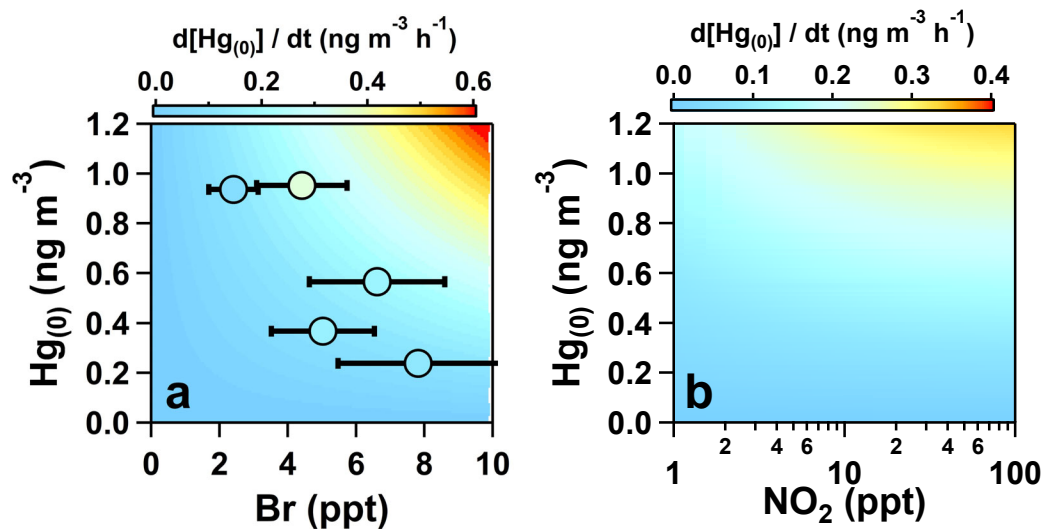

365

366 **Figure S9.  $\text{Hg}^0$  loss rate as a function of (a) Br mole ratio and (b)  $\text{NO}_2$  mole ratio,**  
 367 **color-coded by apparent  $\text{Hg}^0$  loss rate.** Circles in panel (a) are the ambient observations  
 368 during BROMEX color-coded by the observed  $\text{Hg}^0$  loss rate, and the background  
 369 corresponds to calculations (using R.S1-R.S6), assuming 250 K and 20 ppt  $\text{NO}_2$ . Panel (b)  
 370 assumes 250 K and 5 ppt Br.

371

372

| Model inputs                          | Alert 2000                  |      | OASIS 2009                  |      |
|---------------------------------------|-----------------------------|------|-----------------------------|------|
|                                       | 29 April – 6 May 2000       |      | 26-29 March 2009            |      |
|                                       | Mean value                  | Ref. | Mean value                  | Ref. |
| $j_{\text{BrO}}$ ( $\text{s}^{-1}$ )  | $3.8 \times 10^{-12}$ (max) | I    | $3.0 \times 10^{-12}$ (max) | V    |
| $j_{\text{Br}_2}$ ( $\text{s}^{-1}$ ) | $4.3 \times 10^{-12}$ (max) | I    | $4.4 \times 10^{-12}$ (max) | V    |
| NO (ppt)                              | 4                           | II   | 21                          | V    |
| O <sub>3</sub> (ppb)                  | 1.7                         | III  | 0.3                         | V    |
| BrO (ppt)                             | 5                           | III  | 1.4                         | V    |
| Br <sub>2</sub> (ppt)                 | Not available               | -    | 2.5                         | V    |
| HCHO (ppt)                            | 166                         | IV   | 200                         | V    |
| Temperature (K)                       | 256                         | II   | 248                         | V    |

  

| Modeled Br / BrO (ppt ppt <sup>-1</sup> ) | Alert 2000            |     | OASIS 2009       |     |
|-------------------------------------------|-----------------------|-----|------------------|-----|
|                                           | 29 April – 6 May 2000 |     | 26-29 March 2009 |     |
|                                           | No Br <sub>2</sub>    | 1.0 |                  | 4.4 |
| With 1 ppt Br <sub>2</sub>                | 1.5                   |     | 10.3             |     |
| With observed Br <sub>2</sub>             | Not available         |     | 19.3             |     |

374 **Table S1. Model inputs and calculated Br/BrO ratios for two ozone depletion events**  
375 **observed in Alert, Canada (Alert 2000) and Utqiagvik, Alaska (OASIS 2009).** The  
376 Alert 2000 field campaign was conducted in Alert, Canada in April – May 2000; OASIS  
377 2009 campaign was conducted near Utqiagvik, Alaska in March – April 2009. Mean values  
378 correspond to averages across the entire ODEs (except for j-values, for which maximum  
379 values are provided). References: I. Calculated using NCAR TUV  
380 ([http://cprm.acom.ucar.edu/Models/TUV/Interactive\\_TUV/](http://cprm.acom.ucar.edu/Models/TUV/Interactive_TUV/)). II. Beine et al (21). III.  
381 Honninger and Platt (22). IV. Grannas et al (23). V. Thompson et al (11).

382



383 **References**

- 384 1. Custard KD, Pratt KA, Wang S, Shepson PB (2016) Constraints on Arctic  
385 atmospheric chlorine production through measurements and simulations of Cl<sub>2</sub> and  
386 ClO. *Environmental Science & Technology*. doi:10.1021/acs.est.6b03909.
- 387 2. Liao J, et al. (2011) A comparison of Arctic BrO measurements by chemical  
388 ionization mass spectrometry and long path-differential optical absorption  
389 spectroscopy. *Journal of Geophysical Research: Atmospheres (1984–2012)*  
390 116(D1).
- 391 3. Burkholder JB, et al. (2015) Chemical Kinetics and Photochemical Data for Use in  
392 Atmospheric Studies, Evaluation No. 18. *JPL Publication 10-6, Jet Propulsion*  
393 *Laboratory, Pasadena, <http://jpldataeval.jpl.nasa.gov>* .
- 394 4. Ramacher B, Orlando JJ, Tyndall GS (2000) Temperature-dependent rate  
395 coefficient measurements for the reaction of bromine atoms with a series of  
396 aldehydes. *International Journal of Chemical Kinetics* 32(8):460–465.
- 397 5. Tang MJ, Cox RA, Kalberer M (2014) Compilation and evaluation of gas phase  
398 diffusion coefficients of reactive trace gases in the atmosphere: volume 1. Inorganic  
399 compounds. *Atmospheric Chemistry and Physics* 14(17):9233–9247.
- 400 6. Clyne MAA, Woon-Fat AR (1973) Recombination of ground state halogen atoms.  
401 Part 4.-Kinetics of recombination of bromine atoms. *Journal of the Chemical*  
402 *Society, Faraday Transactions 2: Molecular and Chemical Physics* 69(0):412–418.
- 403 7. Sjostedt SJ, et al. (2007) Observations of hydroxyl and the sum of peroxy radicals at  
404 Summit, Greenland during summer 2003. *Atmospheric Environment* 41(24):5122–  
405 5137.
- 406 8. Q-Lab Corporation (2011) Spectral power distribution for QUV with UVA-340  
407 fluorescent lamps. Technical Bulletin LU-8052. Available at: Available at [www.q-](http://www.q-lab.com/products/%0Alamps-optical-filters/lamps-and-optical-filters)  
408 [lab.com/products/%0Alamps-optical-filters/lamps-and-optical-filters](http://www.q-lab.com/products/%0Alamps-optical-filters/lamps-and-optical-filters).
- 409 9. Liao J, et al. (2012) Observations of inorganic bromine (HOBr, BrO, and Br<sub>2</sub>)  
410 speciation at Barrow, AK, in spring 2009. *Journal of Geophysical Research*  
411 117(D00R16):doi:10.1029/2011JD016641.
- 412 10. Wang S, Pratt KA (2017) Molecular Halogens Above the Arctic Snowpack:  
413 Emissions, Diurnal Variations, and Recycling Mechanisms. *Journal of Geophysical*  
414 *Research: Atmospheres*:11,991–12,007.
- 415 11. Thompson CR, et al. (2015) Interactions of bromine, chlorine, and iodine  
416 photochemistry during ozone depletions in Barrow, Alaska. *Atmospheric Chemistry*  
417 *and Physics* 15(16):9651–9679.

- 418 12. Frenzel A, et al. (1998) Heterogeneous Interconversion Reactions of BrNO<sub>2</sub>,  
419 ClNO<sub>2</sub>, Br<sub>2</sub>, and Cl<sub>2</sub>. *The Journal of Physical Chemistry A* 102(8):1329–1337.
- 420 13. Villena G, et al. (2011) Nitrous acid (HONO) during polar spring in Barrow,  
421 Alaska: A net source of OH radicals? *Journal of Geophysical Research:*  
422 *Atmospheres* 116(D14):D00R07.
- 423 14. Liao J, et al. (2014) High levels of molecular chlorine in the Arctic atmosphere.  
424 *Nature Geosci* 7(2):91–94.
- 425 15. Thompson CR, et al. (2017) Bromine atom production and chain propagation during  
426 springtime Arctic ozone depletion events in Barrow, Alaska. *Atmospheric*  
427 *Chemistry and Physics* 17(5):3401–3421.
- 428 16. Simpson WR, et al. (2007) Halogens and their role in polar boundary-layer ozone  
429 depletion. *Atmospheric Chemistry and Physics* 7(16):4375–4418.
- 430 17. Horowitz HM, et al. (2017) A new mechanism for atmospheric mercury redox  
431 chemistry: implications for the global mercury budget. *Atmospheric Chemistry and*  
432 *Physics* 17(10):6353–6371.
- 433 18. Nghiem S V, et al. (2013) Studying Bromine, Ozone, and Mercury Chemistry in the  
434 Arctic. *Eos, Transactions American Geophysical Union* 94(33):289–291.
- 435 19. Moore CW, et al. (2014) Convective forcing of mercury and ozone in the Arctic  
436 boundary layer induced by leads in sea ice. *Nature* 506(7486):81–84.
- 437 20. Toyota K, McConnell JC, Staebler RM, Dastoor AP (2014) Air–snowpack  
438 exchange of bromine, ozone and mercury in the springtime Arctic simulated by the  
439 1-D model PHANTAS Part 1: In-snow bromine activation and its impact on ozone.  
440 *Atmospheric Chemistry and Physics* 14(8):4101–4133.
- 441 21. Beine, J. H, Honrath, E. R, Florent D, Simpson, R. W, Fuentes, D. J (2002) NO<sub>x</sub>  
442 during background and ozone depletion periods at Alert: Fluxes above the snow  
443 surface. *Journal of Geophysical Research: Atmospheres* 107(D21):ACH 7-1-ACH  
444 7-12.
- 445 22. Hönninger G, Platt U (2002) Observations of BrO and its vertical distribution  
446 during surface ozone depletion at Alert. *Atmospheric Environment* 36(15–16):2481–  
447 2489.
- 448 23. Grannas AM, et al. (2002) A study of photochemical and physical processes  
449 affecting carbonyl compounds in the Arctic atmospheric boundary layer.  
450 *Atmospheric Environment* 36(15–16):2733–2742.

451
